# Supplementary material
Source: Springer Nature journal article supplement (https://www.springermedizin.de/resource/supplementary/12985_2011_1669_MOESM4_ESM.pdf/9610770)
Supplement: MOESM4 [file 9610770]

|                               |                                                                                                         |
|-------------------------------|---------------------------------------------------------------------------------------------------------|
| HQ215589_Cro_Cres_12446/09    | CTC GGG CTC TAC TCC ACC AAC AAG CAC CTG GCC TGG GAC CTC ATG AAC CGC TAC AAC ACC TTC TAC TCC ATG ATC GTG |
| GRE-1_genital_2003            | .....                                                                                                   |
| HQ215588_Cro_Goat_11727/10    | .....                                                                                                   |
| GRE-2_teat_2004               | .....                                                                                                   |
| HQ239073_485/09_Chamois_Italy | .....                                                                                                   |
| HQ239072_373/08_Ibex_Italy    | .....                                                                                                   |
| OVU06671_NZ-2/1994-Sheep      | .....                                                                                                   |
| <br>                          |                                                                                                         |
| HQ215589_Cro_Cres_12446/09    | GAG CCG AAG GTG CCG TTC ACG CGG CTC TGC TGC GCC GTC GTC ACG CCC ACG GCC ACG AAC TTC CAC CTC GAC CAC TCC |
| GRE-1_genital_2003            | .....                                                                                                   |
| HQ215588_Cro_Goat_11727/10    | .....                                                                                                   |
| GRE-2_teat_2004               | .....                                                                                                   |
| HQ239073_485/09_Chamois_Italy | .....                                                                                                   |
| HQ239072_373/08_Ibex_Italy    | .....                                                                                                   |
| OVU06671_NZ-2/1994-Sheep      | .....                                                                                                   |
| <br>                          |                                                                                                         |
| HQ215589_Cro_Cres_12446/09    | GGG GGC GGC GTA TTC TTC TCG GAC TCG CCG GAG CGC TTC CTA GGC TTC TAC CGC ACG CTC GAC GAG GAC CTC GTG CTG |
| GRE-1_genital_2003            | .....                                                                                                   |
| HQ215588_Cro_Goat_11727/10    | .....                                                                                                   |
| GRE-2_teat_2004               | .....                                                                                                   |
| HQ239073_485/09_Chamois_Italy | .....                                                                                                   |
| HQ239072_373/08_Ibex_Italy    | .....                                                                                                   |
| OVU06671_NZ-2/1994-Sheep      | .....                                                                                                   |
| <br>                          |                                                                                                         |
| HQ215589_Cro_Cres_12446/09    | CAC CGC ATC GAG AAC GCC AAG AAC AGC ATC GAC CTC TCG CTG CTC TCG ATG GTG CCA GTG ATT AAG CAC GCC AGC GCC |
| GRE-1_genital_2003            | .....                                                                                                   |
| HQ215588_Cro_Goat_11727/10    | .....                                                                                                   |
| GRE-2_teat_2004               | .....                                                                                                   |
| HQ239073_485/09_Chamois_Italy | .....                                                                                                   |
| HQ239072_373/08_Ibex_Italy    | .....                                                                                                   |
| OVU06671_NZ-2/1994-Sheep      | .....                                                                                                   |
| <br>                          |                                                                                                         |
| HQ215589_Cro_Cres_12446/09    | GTG GAG TAC TGG CCG CGG ATC ATA GAC GCG CTG CTG CGC GCG GCC ATC GAC CGC GGC GTG CGC GTG CGC GTG ATC ATT |
| GRE-1_genital_2003            | .....                                                                                                   |
| HQ215588_Cro_Goat_11727/10    | .....                                                                                                   |
| GRE-2_teat_2004               | .....                                                                                                   |
| HQ239073_485/09_Chamois_Italy | .....                                                                                                   |
| HQ239072_373/08_Ibex_Italy    | .....                                                                                                   |
| OVU06671_NZ-2/1994-Sheep      | .....                                                                                                   |
| <br>                          |                                                                                                         |
| HQ215589_Cro_Cres_12446/09    | ACC GAG TGG AAG AAC GCG GAC CCG CTG TCG GTC TCG GCC GCG CGC AGC CTC GAC GAC TTT GGC GTC GGC AGC GTG GAC |
| GRE-1_genital_2003            | .....                                                                                                   |
| HQ215588_Cro_Goat_11727/10    | .....                                                                                                   |
| GRE-2_teat_2004               | .....                                                                                                   |
| HQ239073_485/09_Chamois_Italy | .....                                                                                                   |
| HQ239072_373/08_Ibex_Italy    | .....                                                                                                   |
| OVU06671_NZ-2/1994-Sheep      | .....                                                                                                   |
| <br>                          |                                                                                                         |
| HQ215589_Cro_Cres_12446/09    | ATG TCC GTG CGC AAG TTC GTG GTA CCC GGC                                                                 |
| GRE-1_genital_2003            | .....                                                                                                   |
| HQ215588_Cro_Goat_11727/10    | .....                                                                                                   |
| GRE-2_teat_2004               | .....                                                                                                   |
| HQ239073_485/09_Chamois_Italy | .....                                                                                                   |
| HQ239072_373/08_Ibex_Italy    | .....                                                                                                   |
| OVU06671_NZ-2/1994-Sheep      | .....                                                                                                   |
